# Supplementary material for: The SARS-CoV-2 RNA–protein interactome in infected human cells
Source: PubMed Central journal article supplement (PMC7906908; doi:10.1038/s41564-020-00846-z), 2020-12-21

Original images used to generate Extended Data Figure 1e

anti-SARS-CoV-2 Nucleoprotein (N)

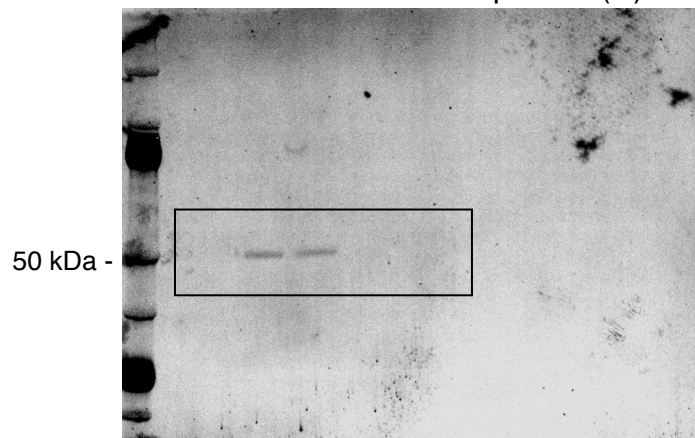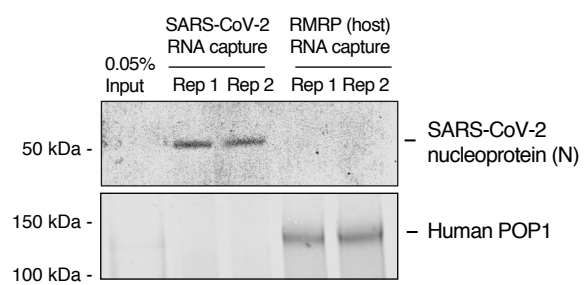

anti-POP1

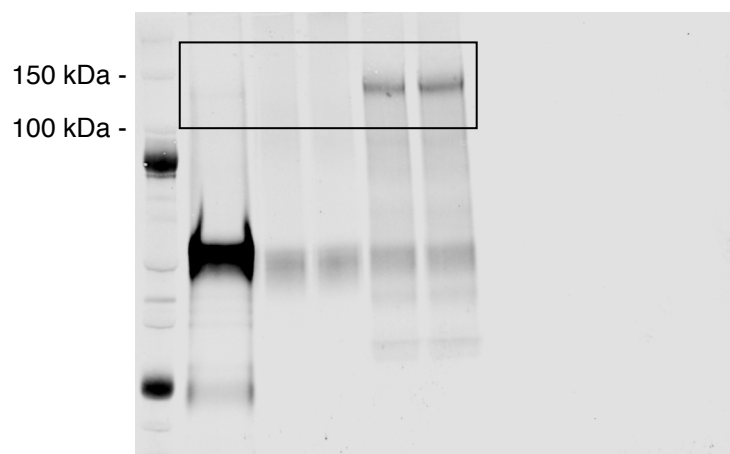

Supplement: 41564_2020_846_MOESM14_ESM.pdf [file 41564_2020_846_MOESM14_ESM.pdf]
