# Supplementary material for: The SARS-CoV-2 RNA–protein interactome in infected human cells
Source: PubMed Central journal article supplement (PMC7906908; doi:10.1038/s41564-020-00846-z), 2020-12-21
Supplement: 41564_2020_846_MOESM15_ESM.pdf [file 41564_2020_846_MOESM15_ESM.pdf]

Original images used to generate Extended Data Figure 4a

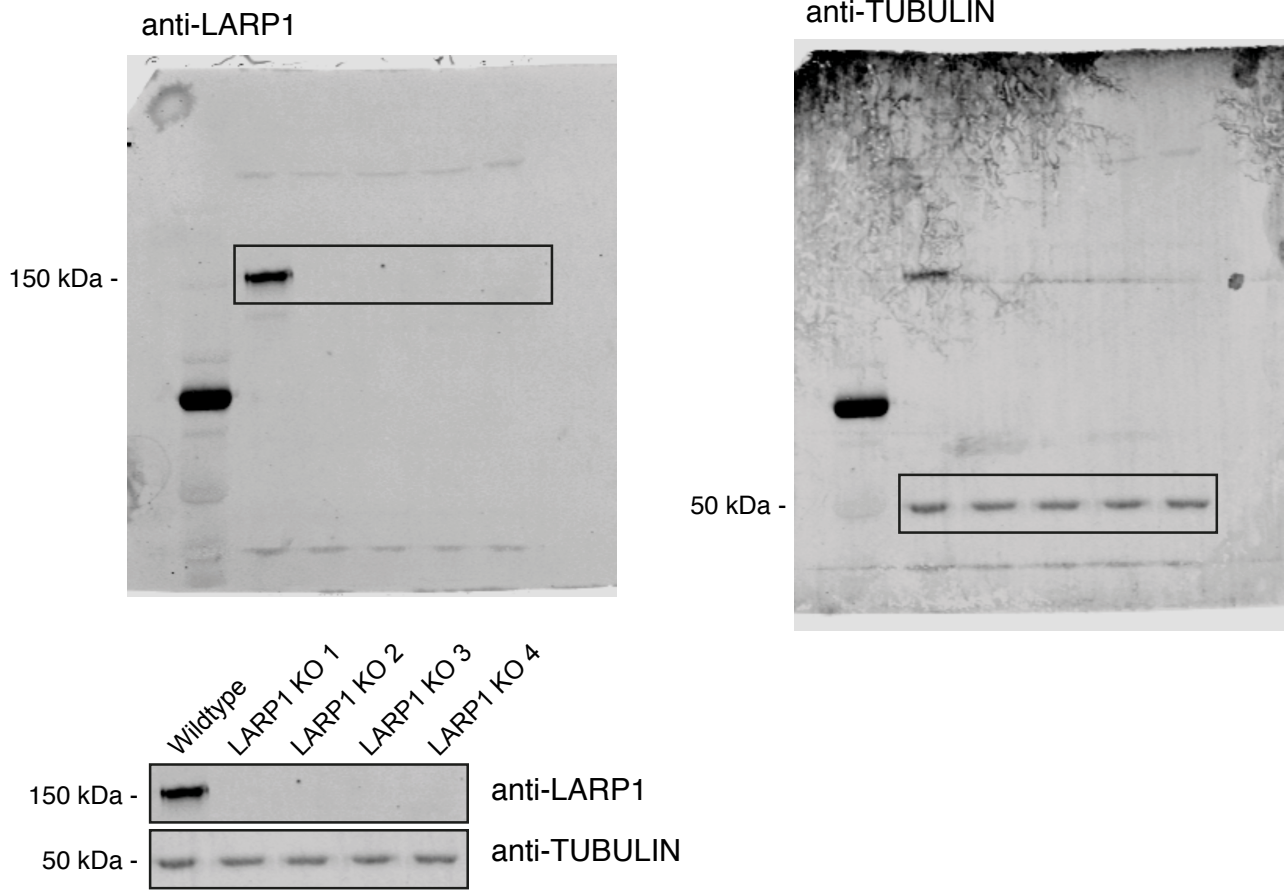

Original images used to generate Extended Data Figure 4b

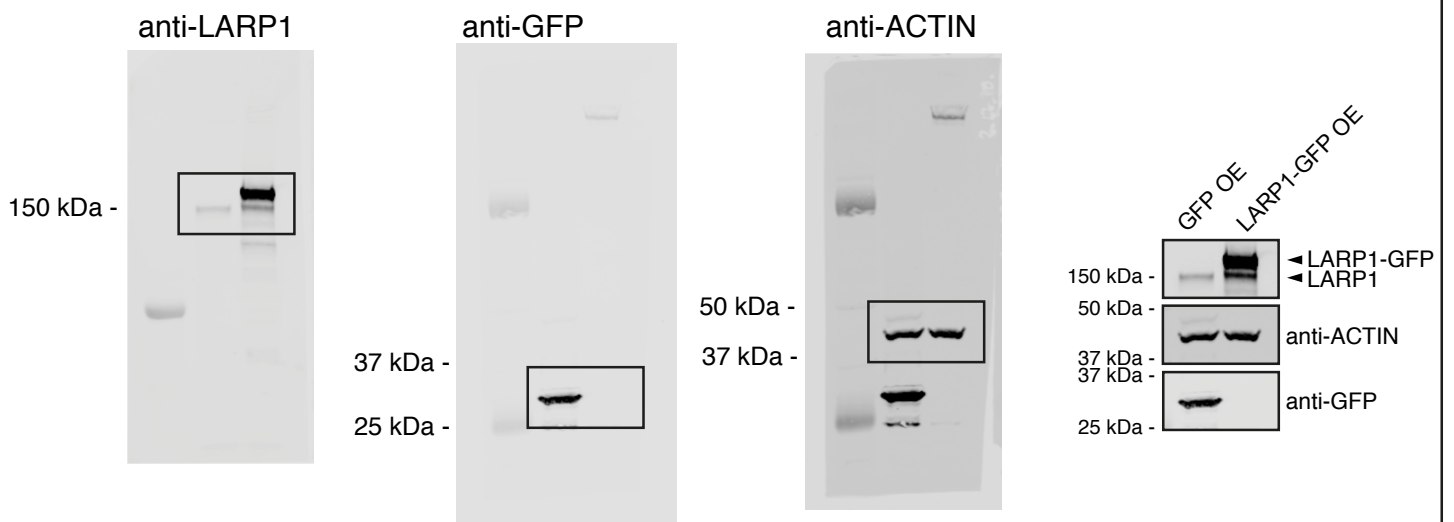

Original images used to generate Extended Data Figure 4c

anti-GFP

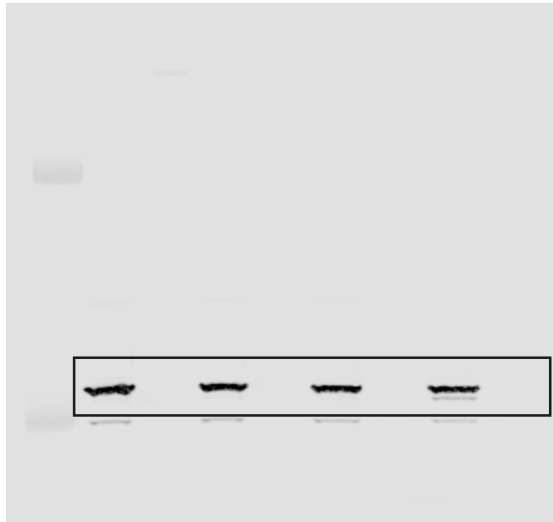

anti-LARP1

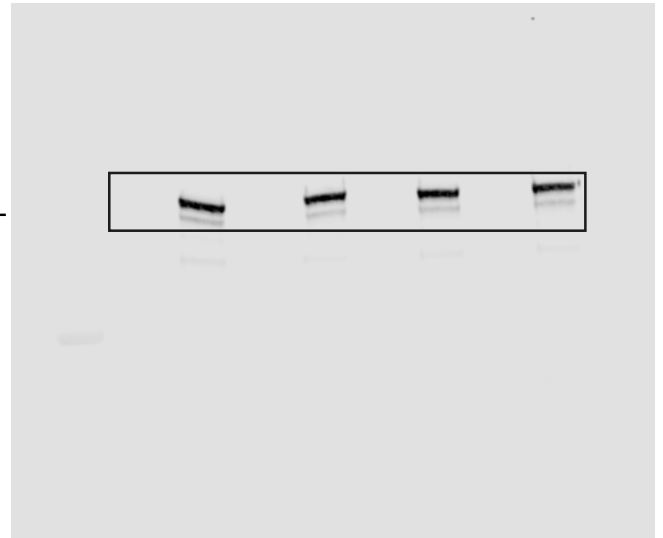

150 kDa -

37 kDa -

25 kDa -

anti-ACTIN

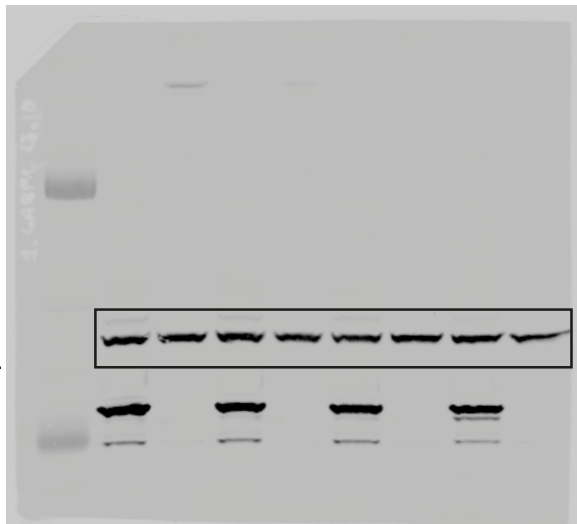

50 kDa -

37 kDa -

LARP1 KO1 LARP1 KO2 LARP1 KO3 LARP1 KO4

| LARP1 KO1 |   | LARP1 KO2 |   | LARP1 KO3 |   | LARP1 KO4 |   |              |
|-----------|---|-----------|---|-----------|---|-----------|---|--------------|
| +         | - | +         | - | +         | - | +         | - | GFP OE       |
| -         | + | -         | + | -         | + | -         | + | LARP1-GFP OE |

37 kDa -

25 kDa -

150 kDa -

50 kDa -

37 kDa -

GFP OE

LARP1-GFP OE

anti-GFP

anti-LARP1

anti-ACTIN
